# Supplementary material
Source: publisher figshare collection journal article supplement (https://frontiersin.figshare.com/ndownloader/files/34105619)
Supplement: Supplementary file [file 34105619]

## *Supplementary Material*

**Supplementary Table I. Implementation of different stimulus pattern for participants. Due to the restrains in our clinical trials, not all participants receive all stimulation studies.**

| Participants | Group | Various Intensities | Various Frequencies | Infra-auricular Montage | Pre-auricular Montage |
|--------------|-------|---------------------|---------------------|-------------------------|-----------------------|
| S1           | Adult | √                   |                     | √                       |                       |
| S2           | child | √                   | √                   | √                       |                       |
| S3           | Adult | √                   | √                   | √                       |                       |
| S4           | child | √                   | √                   | √                       |                       |
| S5           | child | √                   | √                   | √                       |                       |
| S6           | Adult |                     |                     | √                       | √                     |
| S7           | Adult |                     |                     | √                       | √                     |
| S8           | Adult |                     | √                   | √                       | √                     |
| S9           | Adult |                     |                     | √                       | √                     |
| S10          | Adult |                     |                     | √                       | √                     |
| S11          | child |                     |                     | √                       |                       |
| S12          | child |                     |                     | √                       |                       |
| S13          | Adult |                     |                     | √                       |                       |
| S14          | Adult |                     |                     | √                       |                       |
| S15          | Adult |                     |                     | √                       |                       |
| S16          | Adult |                     |                     | √                       |                       |
| S17          | Adult |                     |                     | √                       |                       |
| S18          | Adult |                     |                     | √                       |                       |
| S19          | Adult |                     |                     | √                       |                       |
| S20          | Adult |                     |                     | √                       |                       |
| S21          | Adult |                     |                     | √                       |                       |

√ represent participant received this type of stimulation process.

**Supplementary Table II. The correlation coefficients and linear fit-slope among participants**

| Participants | Voltage  |          | Projected EFs |          |
|--------------|----------|----------|---------------|----------|
|              | <i>r</i> | <i>s</i> | <i>r</i>      | <i>s</i> |
| S1           | 0.99     | 1.96     | 0.913         | 1.97     |
| S2           | 0.94     | 1.38     | 0.83          | 1.24     |
| S3           | 0.977    | 1.08     | 0.78          | 0.97     |
| S4           | 0.937    | 1.29     | 0.662         | 1.02     |
| S5           | 0.98     | 1.55     | 0.808         | 1.38     |
| S6           | 0.83     | 1.09     | 0.56          | 2.12     |
| S7           | 0.98     | 1.03     | 0.801         | 1.43     |
| S8           | 0.97     | 1.51     | 0.77          | 1.03     |
| S9           | 0.978    | 1.28     | 0.791         | 1.47     |
| S10          | 0.94     | 1.21     | 0.82          | 1.13     |
| S11          | 0.98     | 0.997    | 0.76          | 1.15     |
| S12          | 0.98     | 1.29     | 0.72          | 1.214    |
| S13          | 0.89     | 1.93     | 0.58          | 1.32     |
| S14          | 0.93     | 0.76     | 0.69          | 0.82     |
| S15          | 0.98     | 1.73     | 0.65          | 1.31     |
| S16          | 0.96     | 1.32     | 0.57          | 1.43     |
| S17          | 0.90     | 1.07     | 0.53          | 0.98     |
| S18          | 0.96     | 1.53     | 0.59          | 0.76     |
| S19          | 0.97     | 0.74     | 0.77          | 0.68     |
| S20          | 0.99     | 1.51     | 0.87          | 1.52     |
| S21          | 0.84     | 1.56     | 0.49          | 1.31     |

*r*, *s* represent correlation coefficients and slope of a linear fit between measured and simulated values, respectively.

## Supplementary Figure 1

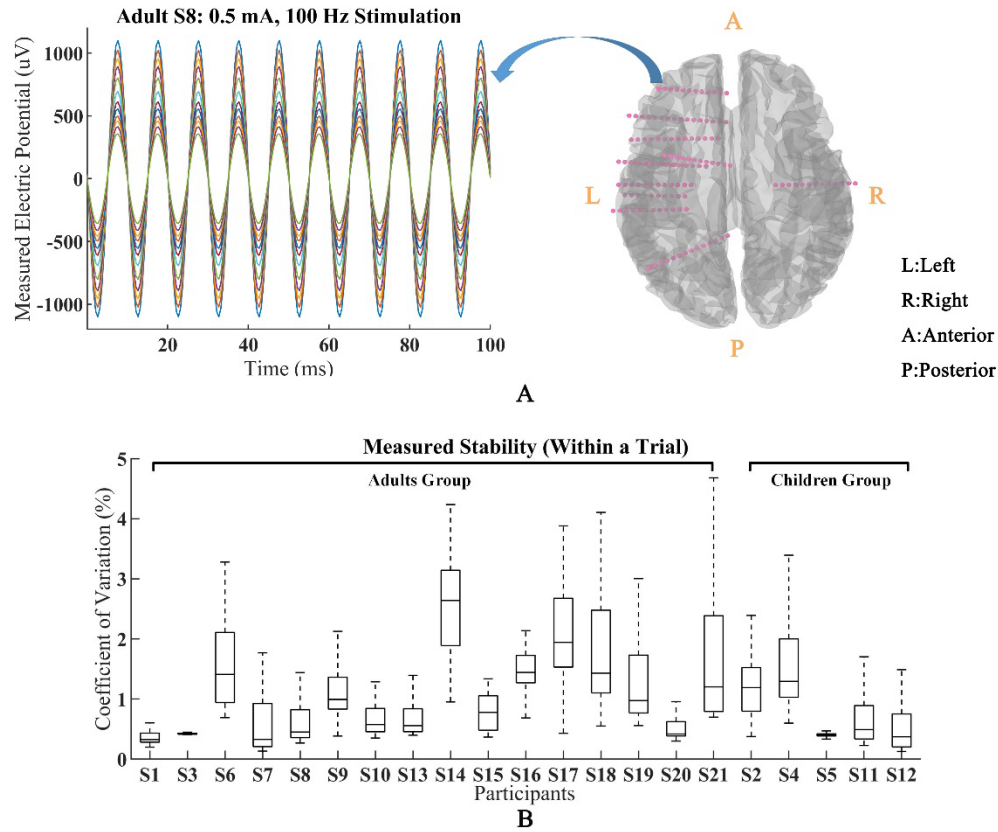

**Supplementary Figure 1** Intracranial voltage recordings and measured stability. **(A)** The left figure is an example of filtered recording signals from participant S8. Each curve represents a different electrode. **(B)** Under 100 Hz/500  $\mu$ A CES, the coefficient of variation of measured peak voltages within a stimulation trial. The average correlation coefficients did not show significant differences for these two groups (adults group: 2.05%; children group: 1.27%,  $p > 0.36$ ).  $p$ -values were derived from two-sided Mann-Whitney U tests.

## Supplementary Figure 2

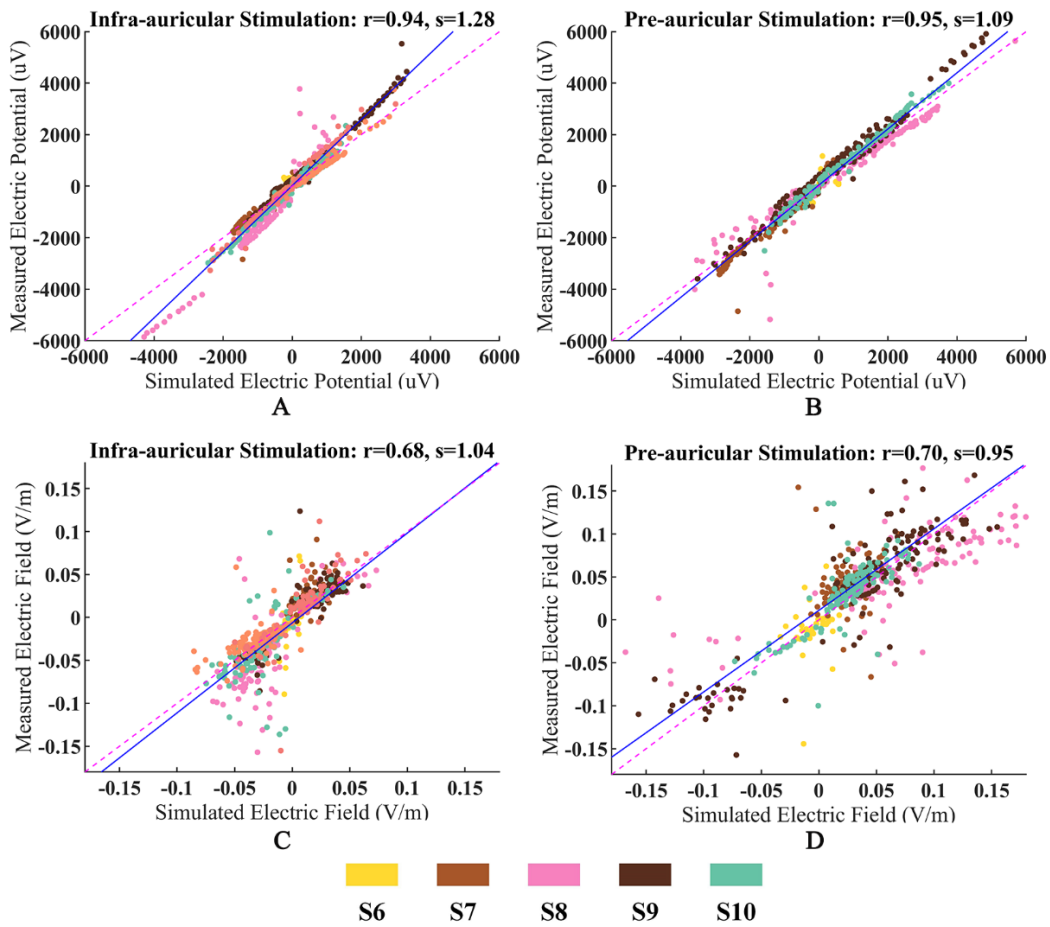

**Supplementary Figure 2** Correlation between simulated and measured values for infra-auricular and pre-auricular montage. The data from different participant were represented by the color-coding of participants at the bottom of the figure. Points falling on the magenta line represent perfect prediction (slope  $s = 1$ ). Blue line represents fitting line.

### Supplementary Figure 3

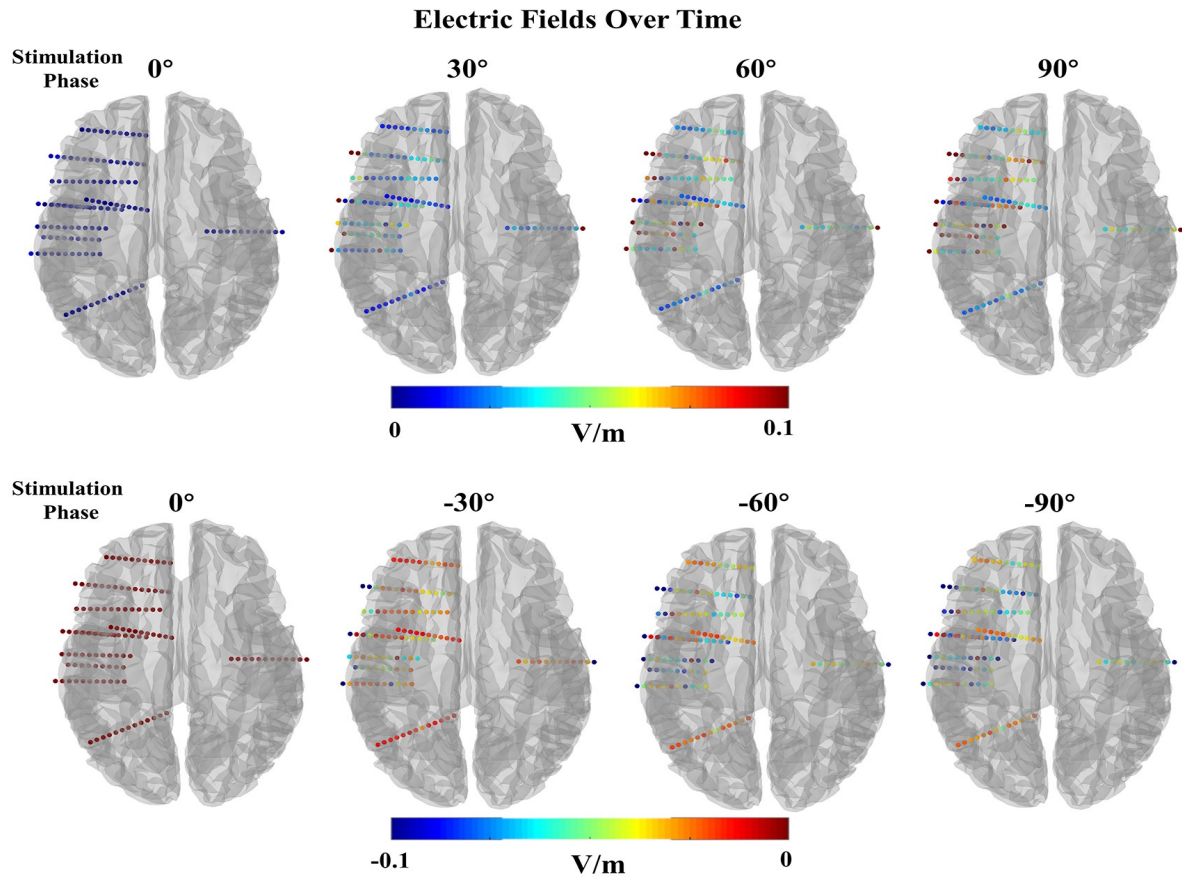

**Supplementary Figure 3** During 100 Hz/500  $\mu$ A CES, the electric fields in the brain over time for participant S8. The color encodes the electric field magnitude.
